1 **Title: CNBP, REL, and BHLHE40 variants are associated with IL-12 and IL-10**  
2 **responses and tuberculosis risk**

3  
4 *Authors:* Javeed A. Shah<sup>1,2</sup>, Alex J. Warr<sup>1</sup>, Andrew D. Graustein<sup>1,2</sup>, Aparajita Saha<sup>1</sup>, Sarah J.  
5 Dunstan<sup>3</sup>, Nguyen T.T. Thuong<sup>4,5</sup>, Guy E. Thwaites<sup>4,5</sup>, Maxine Caws<sup>6</sup>, Phan V.K. Thai<sup>7</sup>,  
6 Nguyen D. Bang<sup>7</sup>, Tran T.H. Chau<sup>4</sup>, Felicia K. Nguyen<sup>1</sup>, Carlo A. Hernandez<sup>1</sup>, Madison A.  
7 Jones<sup>1</sup>, Christopher M. Sasseti<sup>8</sup>, Katherine A. Fitzgerald<sup>8</sup>, Munyaradzi Musvosvi<sup>9</sup>, Anele  
8 Gela<sup>9</sup>, Willem A. Hanekom<sup>9</sup>, Mark Hatherill<sup>9</sup>, Thomas J. Scriba<sup>9</sup>, Thomas R. Hawn<sup>1</sup>.

9  
10 *Affiliations:* <sup>1</sup> University of Washington, Seattle, USA; <sup>2</sup> VA Puget Sound Health Care  
11 System, Seattle, USA; <sup>3</sup> University of Melbourne, Melbourne, Australia; <sup>4</sup> Oxford  
12 University Clinical Research Unit, Ho Chi Minh City, Vietnam; <sup>5</sup> Centre for Tropical  
13 Medicine and Global Health, Nuffield Department of Medicine, University of Oxford,  
14 Oxford, UK; <sup>6</sup> Liverpool School of Tropical Medicine, UK; <sup>7</sup> Pham Ngoc Thach Hospital,  
15 Ho Chi Minh City, Vietnam; <sup>8</sup> University of Massachusetts, Worcester, MA., <sup>9</sup> South  
16 African Tuberculosis Vaccine Initiative, Cape Town, South Africa

17  
18 *Correspondence:* Javeed A. Shah; [jashah@uw.edu](mailto:jashah@uw.edu). O: 206-543-8728; F: 206-339-1771

19  
20 *Author Contributions:* Conceptualization: JAS, TRH, CS, KAF, SD, TS; Methodology: JAS,  
21 TRH, CS, TJS, SD; Validation: JAS, TRH, SD, TJS; Formal Analysis: JAS, TRH, SD, TJS, MH;  
22 Investigation: JAS, AJW, MJ, GPP, CH, AS; Resources: JAS, TRH, SD, MC, NTT, GT, TJS, MH;  
23 Writing – original draft preparation: JAS, TRH, MJ, CH; Writing – editing and revising:  
24 JAS, AJW, MJ, CH, CS, KAF, TJS, MH, TRH; Visualization: JAS, MJ, TRH; Supervision: JAS,  
25 TRH, SD, TJS, NTT; Project Administration: JAS, TRH, CS, TJS, SJD; Funding Acquisition:  
26 JAS, TRH, CS, SD, TJS, MH.

27  
28 *Grant Support:* R01 AI136921 to JAS; P01 AI132130 to CMS, TRH, JAS, SJD, TJS; K24  
29 AI137310 to TRH; AI067497 to KAF.

30  
31 *Short Title:* IL-10, IL-12, and TB

32  
33 *Descriptor Number:* 10.6 Host Defenses to Microbial Pathogens

34  
35 *Total Word Count:* 3332

36  
37 This article has an online data supplement, which is accessible from this issue's table of  
38 content online at [www.atsjournals.org](http://www.atsjournals.org).

1

41

42

43

44

45 **Abstract**

46 Rationale: The major human genes regulating *M. tuberculosis* (Mtb)-induced immune  
47 responses and tuberculosis (TB) susceptibility are poorly understood. Although IL-12  
48 and IL-10 are critical for TB pathogenesis, the genetic factors that regulate their  
49 expression are unknown. CNBP, REL, and BHLHE40 are master regulators of IL-12 and IL-  
50 10 signaling.

51 Objectives: To determine whether common human genetic variation in CNBP, REL and  
52 BHLHE40 is associated with IL-12 and IL-10 expression, adaptive immune responses to  
53 mycobacteria, and susceptibility to TB.

54 Methods and Main Measurements: We characterized the association between common  
55 variants in CNBP, REL, and BHLHE40 and innate immune responses in dendritic cells and  
56 monocyte-derived macrophages (MDM), BCG-specific T cell responses, and  
57 susceptibility to pediatric and adult TB.

58 Results: SNP BHLHE40 rs4496464 was associated with increased *BHLHE40* expression in  
59 MDMs and increased IL-10 from both peripheral blood dendritic cells and MDMs after  
60 LPS and TB whole cell lysate stimulation. SNP BHLHE40 rs11130215, in linkage  
61 disequilibrium with rs4496464, was associated with increased BCG-specific IL2+CD4+ T  
62 cell responses and decreased risk for pediatric TB in South Africa. SNPs REL rs842634  
63 and CNBP rs11709852 were associated with increased IL-12 production from dendritic

3

64 cells, and SNP REL rs842618, in linkage disequilibrium with rs842634, was associated  
65 with increased risk for TB meningitis.

66 Conclusions: Genetic variation in CNBP, REL, and BHLHE40 is associated with IL-12 and  
67 IL-10 cytokine response and TB clinical outcomes. Common human genetic regulation of  
68 well-defined intermediate cellular traits provides insights into mechanisms of TB  
69 pathogenesis.

70 Abstract Word Count: 240

71 Keywords: CNBP, REL, BHLHE40, dendritic cells, genetics, *M. tuberculosis*

## 72 **Introduction**

73           Tuberculosis (TB) is a leading cause of death from infection worldwide. The  
74 current BCG vaccine remains the only approved vaccine against TB despite its partial  
75 and variable effects across populations (1). Vaccine efforts are hampered by a lack of  
76 understanding of the immune correlates of protection (2). Understanding the factors  
77 required to induce effective, long lasting immunity to infections may provide tools to  
78 improve TB vaccines.

79  
80           Twin, Mendelian, linkage, genome-wide association, and candidate gene studies  
81 suggest that genetic factors influence susceptibility to TB (3, 4). Multiple clinical TB  
82 phenotypes show a high degree of heritability, including host susceptibility to  
83 pulmonary TB (5-10), TB meningitis (11, 12), and latent TB infection (13-17). However,  
84 the major genes regulating TB susceptibility have not yet been identified with consistent  
85 results across multiple populations, possibly due to heterogeneous clinical phenotypes  
86 and lack of mechanistic correlation of genetic variants with immunophenotypes (3). To  
87 overcome these obstacles, we evaluated LPS and Mtb whole cell lysate (TBWCL)-induced  
88 cytokine responses from immune cells, followed by clinical correlation, to improve the  
89 power and mechanistic insight of genetic studies.

90

91 Common genetic variation influences the cellular innate immune response to  
92 *Mycobacterium tuberculosis* (Mtb). Multiple studies demonstrate the impact of genetic  
93 variation on innate immune cellular distribution and cytokine responses (18-21).  
94 Quantitative trait loci (QTL) of gene expression demonstrate immune cell-specific effects  
95 (22). Recent advances permit the evaluation of innate immune cytokine responses from  
96 rare cell populations (23, 24). Variants that influence functional responses in immune  
97 cells of interest represent attractive secondary traits which can be correlated with TB  
98 susceptibility and these correlations may provide insight into genetic mechanisms of  
99 disease susceptibility (25).

100

101 Dendritic cells (DCs) present antigen to T cells via MHC Class I and II, co-stimulate  
102 them with CD40 and CD80, and influence T cell differentiation by producing cytokines  
103 like IL-12p70, IL-10, and IL-23, to induce T cell differentiation (26). DCs are essential for  
104 mycobacterial immunity (15, 27) and common genetic variants that influence DC  
105 migration are also associated with TB susceptibility (7). IL-10 and IL-12 are particularly  
106 important for T cell function in Mtb infection. Individuals with Mendelian deficiencies in  
107 IL-12 signaling rapidly develop serious, disseminated mycobacterial infections (28, 29).  
108 However, the effect of common genetic variation on physiologic levels of IL-10 and IL-  
109 12, and the influence of these cytokines on BCG-specific T cell responses and TB  
110 outcomes in humans is not known. After inflammatory stimulation, the transcription

111 factor CNBP and its binding partner c-REL translocate to the nucleus and induce *IL12B*  
112 transcription, which encodes the IL-12p35 protein subunit (30, 31). Likewise, IL-10  
113 production influences Mtb immune responses, as it diminishes T cell activation,  
114 enhances regulatory T cell activity, and may be responsible for delayed T cell priming  
115 observed in the initial Mtb immune response (32, 33). In mice, the transcription factor  
116 BHLHE40 controls IL-10 production from both myeloid and lymphoid cells, with  
117 contribution from CNBP (30, 31, 34). The role of these genes and their genetic variants in  
118 human regulation of T cell responses is unknown. In this study, we investigated whether  
119 common human genetic variation in the transcription factors CNBP, REL, and BHLHE40  
120 were associated with DC cytokine responses, BCG-specific T cell responses and TB  
121 susceptibility.

122

## 123 **Materials and Methods**

### 124 *Ethics Statement*

125 Approval for human study protocols was obtained from the institutional review boards  
126 at local sites and at the University of Washington School of Medicine (Seattle, WA). The  
127 South African study included written informed consent from the parent or legal  
128 guardian of the participant and approval by the University of Cape Town Research Ethics  
129 Committee. Written informed consent was received from all participants before  
130 inclusion in the study. For genetic studies in Vietnam, approval for human study

7

131 protocols was obtained from the human subjects review boards at the University of  
132 Washington School of Medicine, the Hospital for Tropical Diseases, Pham Ngoc Thach  
133 Hospital, Hung Vuong Hospital, and the Oxford Tropical Research Ethics Committee.  
134 Written informed consent was obtained from patients or their relatives if the patient  
135 could not provide consent.

136

### 137 *Study Participants*

138 Study participants in the Seattle cohort were volunteers self-described as healthy  
139 without history of recurrent serious infections. 52% of individuals were female, and 48%  
140 were male. The ethnic composition of this study group was 69% White, 19% Asian, 2%  
141 Black or African American, and 2% Latinx. Average age of study participants was 39, with  
142 interquartile range of 29 – 46 at the time of their enrollment.

143

144 South African study participants were enrolled at the South African Tuberculosis  
145 Vaccine Initiative field site in Worcester, South Africa, near Cape Town as part of a larger  
146 study on BCG vaccination with 11,680 infants (35, 36). This area has one of the highest  
147 rates of TB in the world with an incidence of 3% among children less than 3 years of age  
148 in the study population (35, 36). A nested genetics case-control study was performed  
149 with identification of cases and controls during a 2-year prospective observation period



150 after vaccination at birth. The criteria for detection of TB cases have been described  
151 previously and are summarized in the online supplement (37).

152

153 Study subjects from the Vietnam cohort were described previously and are  
154 summarized here and in detail in the online supplement (12). Subjects with tuberculous  
155 meningitis were recruited from two centers in Ho Chi Minh City, Vietnam: Pham Ngoc  
156 Thach (PNT) Hospital for Tuberculosis and the Hospital for Tropical Diseases (HTD).  
157 Subjects with pulmonary TB were recruited from a network of district TB control units  
158 within Ho Chi Minh City that provide directly observed therapy to TB patients. In  
159 addition, pulmonary TB subjects enrolled were recruited from PNT hospital from 2006  
160 through 2008. Vietnamese population controls were otherwise healthy adults with  
161 primary angle closure glaucoma which have been previously described (38). All case and  
162 control participants were unrelated and greater than 95% were of the Vietnamese Kinh  
163 ethnicity. Previous genetic studies of this population indicate minimal population  
164 substructure (12, 39).

165

166 All statistical analyses are described in the online supplement and were  
167 performed using Stata 14.1 and Prism 8.0 software. The remainder of all experimental  
168 procedures are described in detail in the online supplement.

169

## 170 **Results**

### 171 *Single cell analysis of cytokine production in peripheral blood DCs*

172 To evaluate genetic regulation of IL-10 and IL-12 production from healthy human  
173 donors, we used flow cytometry to measure the proportion of peripheral blood MHC-  
174 II+CD11c+ DCs producing IL-10 and IL-12 after stimulation of whole blood with LPS or  
175 TB whole cell lysate (TBWCL; **Figure 1A**). LPS (10 ng/ml) and TBWCL (50 µg/ml) both  
176 strongly induced IL-12 (**Figure 1B**) and IL-10 (**Figure 1C**) from DCs 24 hours after  
177 stimulation. We also measured cytokine responses to LPS (10 ng/ml) and live BCG (10<sup>6</sup>  
178 CFU/ml) 6 hours after stimulation (**Figure 1D**). We found that LPS and BCG induced IL-  
179 12 6 hours after stimulation in CD11c+ DCs. However, we did not detect IL-10 above  
180 background levels from DCs after 6 hours of stimulation (data not shown).

181

### 182 *Discovery analysis of genetic associations with IL-12 responses to LPS and TBWCL.*

183 We next examined whether candidate gene variants were associated with LPS or  
184 TB whole cell lysate- (TBWCL) induced IL-12 in DCs. We interrogated 4 haplotype-  
185 tagging SNPs from CNBP, 6 from REL, and 19 from BHLHE40 in a local cohort of healthy  
186 volunteers (**Figure E1**). REL SNP rs842634 was associated with increased IL-12 after  
187 TBWCL and LPS stimulation (**Figure 2A**;  $p = 0.044$ , generalized linear model (GLM),  
188 **Figure 2B**;  $p = 0.037$ ). CNBP SNP rs11709852 was associated with increased IL-12

189 production after TBWCL stimulation, but not LPS stimulation (**Figure 2C**;  $p = 0.003$ ;  
190 **Figure 2D**,  $p = 0.48$ ). No SNPs from BHLHE40 were associated with IL-12 (**Table E2**).

191  
192 *CNBP and REL variants are associated with LPS and BCG-induced IL-12 secretion after 6*  
193 *hour stimulation in an independent dataset.*

194 We evaluated the association of our candidate SNPs in a second, independent  
195 cohort with whole blood stimulated with BCG ( $10^6$  CFU/ml) or LPS (10 ng/ml) for 6  
196 hours, followed by measurement of cytokine responses, as described above. REL SNP  
197 rs842634 was associated with increased IL-12 after BCG infection (**Figure 3A**;  $p = 0.046$ ,  
198 generalized linear model) and LPS stimulation (**Figure 3B**;  $p = 0.024$ ). CNBP SNP  
199 rs11709852 was associated with a trend toward increased IL-12 after BCG stimulation  
200 (**Figure 3C**;  $p = 0.078$ , Mann-Whitney U-test), and was also associated with increased IL-  
201 12 after LPS stimulation early in infection (**Figure 3D**;  $p = 0.014$ , Mann-Whitney test).

202  
203 *BHLHE40 SNP rs4496464 is associated with IL-10 secretion from DCs*

204 Next, we evaluated for associations between genetic variants in CNBP, REL, and  
205 BHLHE40 with IL-10 production from DCs. BHLHE40 SNP rs4496464 was associated with  
206 increased IL-10 production after TBWCL stimulation (**Figure 4A**;  $p = 0.005$ , generalized  
207 linear model). In contrast, rs4496464 was not associated with IL-10 after LPS stimulation  
208 (**Figure 4B**,  $p = 0.18$ ). No CNBP or REL SNPs, including rs11709852 and rs842634, were

11

209 associated with IL-10 expression after TBWCL or LPS stimulation. (**Figure 4C – F**).  
210 BHLHE40 SNP rs4496464 was not associated with IL-12 expression after stimulation with  
211 either TBWCL or LPS (**Figure 4G** and **Figure 4H**).

212

213 *Rs4496464 is associated with BHLHE40 mRNA expression in monocyte-derived*  
214 *macrophages*

215 We evaluated whether rs4496464 genotypes were associated with BHLHE40  
216 mRNA expression in peripheral blood monocyte-derived macrophages (MDM) from  
217 healthy donors. The uncommon G allele of rs4496464 was associated with increased  
218 BHLHE40 in unstimulated monocytes using a dominant model of inheritance (**Figure 5**;  
219  $p = 0.026$ , A/A vs (G/A + G/G), Mann-Whitney U-test). No other BHLHE40 SNPs were  
220 associated with expression. There was no association in LPS stimulated monocytes.  
221 CNBP and REL variants were not associated with their respective transcripts (data not  
222 shown).

223

224 *Rs4496464 is associated with IL-10 production in LPS and TBWCL stimulated monocyte-*  
225 *derived macrophages.*

226 To validate our association between rs496464 and IL-10 expression in DCs, we  
227 measured IL-10 secreted from monocyte-derived macrophages (MDMs) stimulated with  
228 either LPS (50 ng/ml) or TBWCL (25  $\mu$ g/ml) overnight (**Figure 6A**,  $n = 26$ ). The rs4496464

229 G allele was associated with increased IL-10 after LPS stimulation (**Figure 6B**,  $p = 0.01$ ,  
230 generalized linear model). SNP rs4496464 was also associated with increased IL-10 after  
231 TBWCL (**Figure 6C**,  $p = 0.005$ , generalized linear model). SNP rs4496464 was not  
232 associated with TNF secretion after either LPS (**Figure 6D**) or TBWCL stimulation (**Figure**  
233 **6E**), which suggests that variation in BHLHE40 is associated with IL-10 production  
234 specifically, over proinflammatory cytokine responses.

235

236 *A genetic marker for REL rs842634 is associated with an increased risk for TB meningitis.*

237 Our data suggests that rs842634 and rs11709852 are associated with increased  
238 IL-12 in DCs and rs4496464 is associated with increased IL-10 production from  
239 peripheral blood monocytes and DCs in our local population. We hypothesized that  
240 these polymorphisms are associated with susceptibility to TB due to their influence on  
241 these critical immune phenotypes. Within a large genome wide association study  
242 comparing Vietnamese individuals with adult pulmonary TB (PTB;  $n = 1598$ ) or TB  
243 meningitis (TBM;  $N = 407$ ) with control subjects ( $N = 1139$ ), we evaluated if SNPs in  
244 CNBP, REL, and BHLHE40 were associated with adult PTB or TBM and in LD with our  
245 SNPs of interest (**Figure E2**). Although REL rs842634 was not associated with TBM, it was  
246 in moderate to high LD with rs842618 in the Seattle cohort ( $R^2 0.69$ ,  $D' 1.0$ ) as well as in  
247 the Vietnamese population ( $R^2 0.39$ ,  $D' 1.0$ ). The minor allele of REL SNP rs842618 was  
248 associated with an increased risk for TBM ( $p = 0.03$ ; OR 1.27, allelic model, **Table 1 and**

249 **Table E3**). These data best fit a dominant model (**Table 1**,  $p = 0.035$ , OR 1.32, 95% CI  
250 1.02 – 1.73) No BHLHE40 or CNBP SNPs were associated with TBM, including rs4496464  
251 and rs11709852. We did not identify any associations between SNPs in REL, CNBP, or  
252 BHLHE40 SNPs with PTB (**Table E4**). Together, these data suggest that a causal REL  
253 SNP linked to rs842634 and rs842618 is associated with both increased IL-12 production  
254 and increased risk of adult TBM in Vietnam.

255

256 *BHLHE40 variants are associated with pediatric TB in South Africa.*

257 We next evaluated whether variants in CNBP, REL, and BHLHE40 were associated with  
258 pediatric TB in South Africa (**Figure E3**) (40). BHLHE40 SNP rs11130215 was associated  
259 with decreased risk for pediatric TB in an allelic model (**Table 2 and Table E5**;  $p = 0.001$ )  
260 which best fit a dominant model of inheritance  $p = 3.3 \times 10^{-4}$ , OR 0.5 (0.33 – 0.75).  
261 Rs11130215 was in low LD with rs4496464 in the South African cohort ( $R^2$  0.10,  $D'$  0.30).  
262 To adjust for ethnic heterogeneity, we genotyped a panel of 95 ancestry informational  
263 markers (AIMs) and performed principal components analysis, as described previously  
264 (37). The association between rs11130215 and pediatric TB remained statistically  
265 significant after adjustment for gender and the top five principal components of the  
266 tested AIMs (**Table 2**,  $p = 0.01$ , OR 0.24 - 0.83). No REL or CNBP SNPs were associated  
267 with pediatric TB, including rs842634 and rs11709852. Together, these data suggest that

268 a BHLHE40 polymorphism (rs11130215) linked to rs4496464 and increased IL-10  
269 expression is associated with a decreased risk for pediatric TB.

270

271 *CREL, CNBP and BHLHE40 SNPs are not associated with BCG-induced T cell responses in*  
272 *South African infants.*

273 We next examined whether these variants were associated with adaptive immune  
274 responses as a possible mechanism of TB susceptibility due to DC regulation of T cell  
275 responses. We tested this hypothesis in a cohort of South African infants that were  
276 vaccinated with BCG at birth and whose BCG-specific CD4+ IL-2, TNF, and IFN $\gamma$ +T cell  
277 responses were measured at 10 weeks of age by flow cytometry (36, 37) (**Figure E4**).  
278 Overall media (**Figure 7A**), BCG-induced (**Figure 7B**), and SEB-induced (**Figure 7C**)  
279 responses are shown. We evaluated the association between genetic variation in our  
280 SNPs of interest: rs842634, rs11709852, rs4496464, and rs11130215, with the frequency  
281 of BCG-induced IL-2, TNF, and IFN $\gamma$  in CD4+ T-cells. Rs11709852 and rs842634 were  
282 monoallelic in the South African cohort and not analyzed further. Rs4496464 was  
283 associated with a trend toward increased IL2+CD4+ T cell frequency after BCG re-  
284 stimulation but this did not achieve statistical significance (**Figure 7D**,  $p = 0.15$ ,  
285 generalized linear model). This SNP was not associated with TNF or IFN $\gamma$  frequency in  
286 CD4+ T cells (**Figure 7E-F**). The G allele of BHLHE40 rs11130215 was associated with  
287 increased frequency of BCG-specific IL2+CD4+ cells (**Figure 7G**,  $p = 0.015$ , generalized

288 linear model), but not TNF or IFN $\gamma$  (**Figure 7H-I**). In a second validation cohort,  
289 rs11130215 was associated with a trend toward increased IL-2 expression that did not  
290 achieve statistical significance (**Figure 7J**,  $p = 0.06$ , generalized linear model). However,  
291 when these data were combined, we found that this SNP was associated with increased  
292 IL-2 from CD4 $^+$  T cells (**Figure 7K**,  $p = 0.006$ , generalized linear model). Taken together,  
293 these data suggest that a BHLHE40 variant is associated with increased IL-2-producing  
294 CD4 $^+$  T cells, and decreased risk for pediatric TB in a genetic cohort of South African  
295 infants.

296

## 297 **Discussion**

298 IL-12 and IL-10 are both essential for an effective host response to tuberculosis,  
299 and overexpression of either cytokine can similarly lead to adverse outcomes. In this  
300 paper, we found that variation in REL and BHLHE40, genes that directly influence  
301 expression of these cytokines, is associated with secretion of IL-12 and IL-10,  
302 respectively, from peripheral blood DCs using a flow cytometry-based assay. To our  
303 knowledge, this assay has not been used previously to evaluate the genetics of DC  
304 immune responses (20, 41). Related variants in REL were associated with increased  
305 expression of IL-12 and also with increased susceptibility to TBM, and SNPs in BHLHE40  
306 associated with increased IL-10 were also associated with decreased risk for pediatric TB.



307 These data represent the most comprehensive evaluation of the human genetic loci  
308 associated with IL-10 and IL-12 production in TB pathogenesis.

309

310 Both insufficient and excessive IL-10 responses are harmful to TB control (32, 42).  
311 We found BHLHE40 variants that were associated with increased IL-10 production in  
312 myeloid cells after LPS and TB whole cell lysate stimulation. A variant in linkage  
313 disequilibrium was also associated with increased BCG-specific IL-2+CD4+ T cells with  
314 stable frequencies of TNF+ and IFN $\gamma$ + CD4+ T cells in South African infants. Critically,  
315 this variant was associated with decreased risk for developing pediatric TB. Canonically,  
316 increased IL-10 is associated with increased differentiation of regulatory T cells (43),  
317 which may delay the appropriate activation of effective adaptive immune responses to  
318 Mtb (44). However, a balanced immune response with increased number of antigen-  
319 specific T cells overall is beneficial to preventing infection. The relatively modest  
320 changes to the cytokine response associated with genotype may influence T cell  
321 proliferation and differentiation to promote a balanced and effective T cell response  
322 (45). Moreover, BHLHE40 also demonstrates direct effects on T cell function in murine  
323 models, and may be an alternate mechanism for the phenotypes we observed (46). IL-10  
324 decreases pathology that may promote effective Mtb control (34, 47). Our observations  
325 are consistent with a model whereby modest increases in BHLHE40 are associated with  
326 increased IL-10 in macrophages, expanded IL-2+CD4+ T cell responses, and protection

327 from TB. Notably, these data support findings from the mouse model, where BHLHE40  
328 deficiency was associated with early Mtb death due to excessive neutrophil-dominant  
329 inflammatory response (34). Study of the factors that influence IL-10 expression may  
330 provide insight into a suite of macrophage or T cell changes that may provide insight  
331 into TB susceptibility and control.

332

333 Variation in REL rs842634 was associated with increased IL-12 production from  
334 dendritic cells after LPS and TBWCL stimulation. A SNP in linkage disequilibrium,  
335 rs842618, was also associated with increased risk for TB meningitis in a Vietnamese  
336 cohort. Although IL-12 is canonically associated with protection from TB, significant  
337 evidence has accumulated that increases in proinflammatory cytokines, including TNF  
338 and IFN $\gamma$ , may also be harmful for Mtb control in some settings, including TBM (12, 45,  
339 48). Although IL-12 $\alpha$  and IFN $\gamma$  are essential for control of Mtb infection, the amount  
340 necessary for protection remains unclear (45). Excessive IFN $\gamma$  induces immune pathology  
341 requiring anti-inflammatory therapy during TB immune reconstitution syndrome (49). IL-  
342 12 also induces TNF, in CD4 $^{+}$  T cells as part of the Th1 response (50). Excess TNF in  
343 Mtb-infected macrophages leads to necrosis and Mtb spread, and worsens TBM  
344 outcomes (51). Identification of genetic factors that modulate dendritic cell  
345 proinflammatory cytokines provides insight into the optimal balance of cytokines to  
346 control Mtb in adults.

347

348           This study has several potential limitations. We do not yet have evidence of  
349 functional SNPs that directly regulate gene function. Future fine-mapping studies with *in*  
350 *vitro* mechanistic assays will be required to determine the specific alleles that regulate  
351 cellular function and clinical outcomes together. A second limitation is that some of  
352 these observations do not achieve statistical significance after adjustments for multiple  
353 comparisons with associations with clinical outcomes. Although this limitation is true for  
354 the clinical findings, the evidence supporting a genetic regulatory role of human cellular  
355 IL12/IL10 responses was robust and provided support for the possible clinical  
356 associations. Given this, we used a threshold of  $p < 0.05$  as a measure of statistical  
357 significance, without the conservative Bonferroni correction. Further studies will be  
358 needed in additional cohorts, particularly after discovery of the causal SNP that  
359 regulates cytokine production. Third, case-control studies of TB outcomes may have  
360 misclassification of controls, as we examined population controls in studies in our  
361 Vietnamese cohort. However, classification errors that arise from such control  
362 populations likely lead to reduction in the statistical power of these studies.

363

364           To our knowledge, this study represents the most comprehensive analysis to date  
365 of genetic regulation of dendritic cell IL-12 and IL-10 production by common  
366 polymorphisms and their association with TB outcomes. Although further studies are

367 required, overlapping genetic studies of immune outcomes and TB clinical susceptibility  
368 may lead to important breakthroughs in TB vaccine design and immune drug  
369 development.

370

### 371 **Acknowledgements**

372 The authors thank the individuals and families who participated in the study. They also  
373 thank the immunology and clinical teams at the hospitals in Ho Chi Minh City, Vietnam  
374 and Worcester, South Africa for obtaining informed consent and collecting and  
375 processing samples from study participants. They acknowledge the support of the  
376 Center for Emerging and Reemerging Infectious Disease Flow Cytometry Facility at the  
377 University of Washington.

378 **Figure Legends**

379 **Figure 1. IL-10 and IL-12 responses in peripheral blood DCs in whole blood**  
380 **stimulation assay**

381 Peripheral whole blood was obtained from healthy volunteers and stimulated with either  
382 negative control or immune stimuli followed by BFA and monensin 2 hours afterward.  
383 Afterward cells were fixed and frozen. At the time of staining, samples were thawed in  
384 large batches to minimize batch effects. A) Gating strategy. From *left to right*, singlets  
385 were selected, then leukocytes. CD66+ cells were gated out, and the HLA-DR+  
386 population selected. CD14- and CD16- and CD11c+ cell population was selected and  
387 the proportion of cytokine positive cells were measured as compared to total number of  
388 HLA-DR+CD11c+ DCs.

389 B) Proportion of IL-12+CD11c+ DCs after media control, LPS (10 ng/ml), or Mtb whole  
390 cell lysate (TBWCL; 50 µg/ml) stimulation for 24 hours.

391 C) Proportion of IL-10+CD11c+ DCs after media, LPS, or TBWCL for 24 hours.

392 D) Proportion of IL-12+CD11c+ DCs after media, LPS, or live BCG (10<sup>6</sup> CFU) stimulation  
393 for 6 hours. Bars demonstrate median values. Data provided are not corrected for  
394 background cytokine positivity. Dots represent individual values. N = 46.

395

396 **Figure 2. REL SNP rs842634 and CNBP SNP rs11798052 are associated with IL-12**  
397 **production after TBWCL stimulation of peripheral blood DCs for 24 hours**

21

398 A-B) Proportion of CD11c+ DCs producing IL-12 after A) Mtb whole cell lysate (TBWCL;  
399 50 µg/ml) stimulation or B) LPS (10 ng/ml) stimulation for 24 hours. Data are stratified  
400 by rs842634 genotype; N = 19 T/T, 21 T/C, and 7 C/C.

401 C-D) Proportion of CD11c+ DCs producing IL-12 after C) TBWCL or D) LPS stimulation  
402 for 24 hours. Data are stratified by rs11798052 genotype; N = 34 G/G, 5 G/A, and 2 A/A.

403 All data presented in this figure and afterward represent background-corrected values  
404 (proportion of cytokine-producing cells after ligand stimulation – proportion of  
405 cytokine-producing cells after media control stimulation).

406 \* p < 0.05; statistical significance determined by generalized linear model.

407

408 **Figure 3. REL SNP rs842634 is associated with IL-12 production in peripheral blood**  
409 **DCs after 6 hours of BCG or LPS stimulation**

410 A-B) Proportion of CD11c+ DCs producing IL-12 after A) live BCG stimulation ( $10^6$  CFU)  
411 or B) LPS (10 ng/ml) stimulation for 6 hours. Data are stratified by rs842634 genotype; N  
412 = 15 T/T, 16 T/C, and 4 C/C.

413 C-D) Proportion of CD11c+ DCs producing IL-12 after C) live BCG stimulation or D) LPS  
414 stimulation for 6 hours. Data are stratified by rs11798052 genotype; N = 31 G/G, 5 G/A.

415 \* p < 0.05; \*\* p < 0.01, \*\*\* p < 0.001; statistical significance determined by generalized  
416 linear model for A-B and Mann-Whitney U-test for C-D.

417

418 **Figure 4. BHLHE40 SNP rs4496464 is associated with IL-10 production from**  
419 **peripheral blood DCs after Mtb whole cell lysate stimulation**

420 A-B) Proportion of CD11c+ DCs producing IL-10 after A) Mtb whole cell lysate (TBWCL;  
421 50 µg/ml) or B) LPS (10 ng/ml) stimulation for 24 hours. Data are stratified by rs4496494  
422 genotype; N = 40 A/A, 7 G/A and 2 G/G.

423 C-D) Proportion of CD11c+ DCs producing IL-10 after C) LPS or D) TBWCL stimulation  
424 for 24 hours. Data are stratified by rs11798052 genotype; N = 33 G/G, 5 G/A, and 2 A/A.

425 E-F) Proportion of CD11c+ DCs producing IL-10 after E) LPS or F) TBWCL stimulation for  
426 24 hours. Data are stratified by rs842634 genotype; n = 19 T/T genotype, 21 T/C  
427 genotype, and 7 C/C genotype.

428 G-H) Proportion of CD11c+ DCs producing IL-12 after E) TBWCL or F) LPS stimulation  
429 for 24 hours. Data are stratified by rs4496494 genotype. N = 38 A/A, 7 G/A, 2 G/G.

430 \* p < 0.05; \*\* p < 0.01, \*\*\* p < 0.001; generalized linear model.

431

432 **Figure 5. BHLHE40 SNP rs4496464 is associated with increased BHLHE40 mRNA**  
433 **expression in monocyte-derived macrophages**

434 BHLHE40 mRNA expression, normalized to GAPDH expression, was measured from RNA  
435 extracted from MDMs isolated from healthy volunteers and stratified by rs4496464; n =  
436 26 A/A, 7 G/A, and 1 G/G. \* p < 0.05; dominant genetic model.

437

438 **Figure 6. BHLHE40 SNP rs4496464 is associated with IL-10 production from**  
439 **monocyte-derived macrophages**

440 Peripheral blood monocytes were differentiated into macrophages by M-CSF for 5 days,  
441 then stimulated with either LPS (50 ng/ml) or Mtb whole cell lysate (TBWCL; 25 µg/ml).

442 A) Overall IL-10 cytokine concentrations from cellular supernatants MDMs after 24 hours  
443 of stimulation.

444 B-C) Concentration of IL-10 in cellular supernatants after B) LPS stimulation or C) TBWCL  
445 stimulation for 24 hours, stratified by rs4496494 genotype. N = 20 A/A, 6 G/A, 2 G/G.

446 D-E) Concentration of TNF in cellular supernatants after D) LPS stimulation or E) TBWCL  
447 stimulation for 24 hours and stratified by rs4496464.

448 \* P < 0.05, \*\* P < 0.01, \*\*\* P < 0.001; generalized linear model.

449

450 **Figure 7. BHLHE40 SNP rs11130215 is associated with BCG-induced IL-2+CD4+ T-**  
451 **cell responses in South African infants**

452 BCG-specific CD4+ T cell responses from South African infants at 10 weeks of age were  
453 measured by flow cytometry and stratified by genotype of interest. Background  
454 correction was performed by subtracting the proportion of cytokine-producing cells  
455 after BCG or SEB stimulation from media control stimulation.

456 A-C) A) Media control, B) BCG-induced, and C) staphylococcus enterotoxin B (SEB)-  
457 induced IL-2, TNF, and IFN $\gamma$ + CD4+ T cell responses. N = 88.



24

458 D-F) We measured the frequency of BCG-specific D) IL-2+, E) TNF+, and F) IFN $\gamma$ + CD4+  
459 T cells after 12 hours of re-stimulation and stratified by rs4496464. A/A N = 29, G/A N =  
460 44, G/G N = 11.

461 G-I) We measured the frequency of BCG-specific G) IL-2+, H) TNF+, and I) IFN $\gamma$ + CD4+ T  
462 cells after 12 hours of re-stimulation and stratified by rs11130215 in a discovery cohort.  
463 A/A N = 24, G/A N = 31, G/G N = 19.

464 J) Proportion of BCG-specific IL-2+CD4+ T cells, stratified by rs11130215, in an  
465 independent validation set. A/A N = 26, G/A N = 47, G/G N = 20.

466 K) Combined datasets from D) and I).

467 All data visualized as Tukey plots, with middle bar representing median, thick bars with  
468 interquartile range, and whiskers drawn to 10-90<sup>th</sup> percentile. Outliers are represented  
469 with dots. \* p < 0.05, \*\* p < 0.01, generalized linear model.

470

471

472 **Table 1. Association of REL SNPs with adult TB meningitis in Vietnam.** Number of  
473 individuals with major homozygous (AA), heterozygous (Aa), and minor homozygous  
474 (aa) genotypes described. Total: total N in group after genotyping. Allelic p: p value in  
475 an allelic genetic model. Dom p: p value in a dominant genetic model of inheritance. OR:  
476 odds ratio in an allelic genetic model. CI: confidence interval.

477

| locus    | Gene | Control |     |    | Total | Case |    |    | Total | Allelic p | Dom p | OR<br>(95% CI)           |
|----------|------|---------|-----|----|-------|------|----|----|-------|-----------|-------|--------------------------|
|          |      | AA      | Aa  | aa |       | AA   | Aa | aa |       |           |       |                          |
| rs842618 | REL  | 883     | 231 | 13 | 1075  | 289  | 99 | 7  | 395   | 0.032     | 0.035 | 1.33<br>(1.02 –<br>1.73) |
| rs842634 | REL  | 901     | 218 | 11 | 1130  | 299  | 92 | 6  | 397   | 0.052     | 0.064 | 1.21<br>(0.72-<br>2.0)   |

478

479

480 **Table 2. Association of SNPs with pediatric TB in South Africa.** Number of  
 481 individuals with major homozygous (AA), heterozygous (Aa), and minor homozygous  
 482 (aa) genotypes described. Allelic p: p value in an allelic genetic model. Dom p: p value in  
 483 a dominant genetic model by logistic regression with adjustment for ancestry and  
 484 gender. OR: odds ratio; CI: confidence interval. \* adjusted for ethnicity and gender by  
 485 logistic regression.

| locus      | Gene    | Control |     |    |       | Case |    |    |       | Allelic p | Dom p                | OR (95% CI)         |
|------------|---------|---------|-----|----|-------|------|----|----|-------|-----------|----------------------|---------------------|
|            |         | AA      | Aa  | aa | Total | AA   | Aa | aa | Total |           |                      |                     |
| rs11130215 | BHLHE40 | 99      | 169 | 65 | 333   | 78   | 67 | 25 | 170   | 0.001     | 3.3x10 <sup>-4</sup> | 0.5 (0.33 – 0.75)   |
|            |         |         |     |    |       |      |    |    |       |           | 0.012*               | 0.56 (0.28 – 0.87)* |
| rs4496464  | BHLHE40 | 158     | 141 | 35 | 334   | 86   | 66 | 17 | 169   | 0.51      | 0.48                 | 1.21 (0.72– 2.0)    |
|            |         |         |     |    |       |      |    |    |       |           | 0.39*                | 1.30 (0.71– 2.4)*   |

486

487

488

## 489 References

- 490 1. Mangtani P, Abubakar I, Ariti C, Beynon R, Pimpin L, Fine PE, Rodrigues LC, Smith  
491 PG, Lipman M, Whiting PF, Sterne JA. Protection by BCG vaccine against  
492 tuberculosis: a systematic review of randomized controlled trials. *Clin Infect Dis*  
493 2014; 58: 470-480.
- 494 2. Sable SB, Posey JE, Scriba TJ. Tuberculosis Vaccine Development: Progress in  
495 Clinical Evaluation. *Clin Microbiol Rev* 2019; 33.
- 496 3. Abel L, Fellay J, Haas DW, Schurr E, Srikrishna G, Urbanowski M, Chaturvedi N,  
497 Srinivasan S, Johnson DH, Bishai WR. Genetics of human susceptibility to active  
498 and latent tuberculosis: present knowledge and future perspectives. *The Lancet*  
499 *infectious diseases* 2018; 18: e64-e75.
- 500 4. Abel L, El-Baghdadi J, Bousfiha AA, Casanova JL, Schurr E. Human genetics of  
501 tuberculosis: a long and winding road. *Philosophical transactions of the Royal*  
502 *Society of London Series B, Biological sciences* 2014; 369: 20130428.
- 503 5. Casanova J-L, Abel L. Genetic Dissection of Immunity to Tuberculosis: The Human  
504 Model. *Annu Rev Immunol* 2002; 20: 581-620.
- 505 6. Thye T, Owusu-Dabo E, Vannberg FO, van Crevel R, Curtis J, Sahiratmadja E,  
506 Balabanova Y, Ehmen C, Muntau B, Ruge G, Sievertsen J, Gyapong J,  
507 Nikolayevskyy V, Hill PC, Sirugo G, Drobniowski F, van de Vosse E, Newport M,  
508 Alisjahbana B, Nejentsev S, Ottenhoff TH, Hill AV, Horstmann RD, Meyer CG.  
509 Common variants at 11p13 are associated with susceptibility to tuberculosis. *Nat*  
510 *Genet* 2012; 44: 257-259.
- 511 7. Curtis J, Luo Y, Zenner HL, Cuchet-Lourenco D, Wu C, Lo K, Maes M, Alisaac A,  
512 Stebbings E, Liu JZ, Kopanitsa L, Ignatyeva O, Balabanova Y, Nikolayevskyy V,  
513 Baessmann I, Thye T, Meyer CG, Nurnberg P, Horstmann RD, Drobniowski F,  
514 Plagnol V, Barrett JC, Nejentsev S. Susceptibility to tuberculosis is associated  
515 with variants in the ASAP1 gene encoding a regulator of dendritic cell migration.  
516 *Nat Genet* 2015; 47: 523-527.
- 517 8. Luo Y, Suliman S, Asgari S, Amariuta T, Baglaenko Y, Martinez-Bonet M, Ishigaki K,  
518 Gutierrez-Arcelus M, Calderon R, Lecca L, Leon SR, Jimenez J, Yataco R,  
519 Contreras C, Galea JT, Becerra M, Nejentsev S, Nigrovic PA, Moody DB, Murray  
520 MB, Raychaudhuri S. Early progression to active tuberculosis is a highly heritable  
521 trait driven by 3q23 in Peruvians. *Nat Commun* 2019; 10: 3765.
- 522 9. Koeken V, Verrall AJ, Ardiansyah E, Apriani L, Dos Santos JC, Kumar V, Alisjahbana  
523 B, Hill PC, Joosten LAB, van Crevel R, van Laarhoven A. IL-32 and its splice  
524 variants are associated with protection against Mycobacterium tuberculosis  
525 infection and skewing of Th1/Th17 cytokines. *J Leukoc Biol* 2020; 107: 113-118.
- 526 10. Png E, Alisjahbana B, Sahiratmadja E, Marzuki S, Nelwan R, Balabanova Y,  
527 Nikolayevskyy V, Drobniowski F, Nejentsev S, Adnan I, van de Vosse E, Hibberd  
528 ML, van Crevel R, Ottenhoff TH, Seielstad M. A genome wide association study  
529 of pulmonary tuberculosis susceptibility in Indonesians. *BMC Med Genet* 2012;  
530 13: 5.
- 531 11. Caws M, Thwaites G, Dunstan S, Hawn TR, Lan NT, Thuong NT, Stepniowska K,  
532 Huyen MN, Bang ND, Loc TH, Gagneux S, van Soolingen D, Kremer K, van der  
533 Sande M, Small P, Anh PT, Chinh NT, Quy HT, Duyen NT, Tho DQ, Hieu NT,

- 534 Torok E, Hien TT, Dung NH, Nhu NT, Duy PM, van Vinh Chau N, Farrar J. The  
535 influence of host and bacterial genotype on the development of disseminated  
536 disease with Mycobacterium tuberculosis. *PLoS Pathog* 2008; 4: e1000034.
- 537 12. Shah JA, Vary JC, Chau TT, Bang ND, Yen NT, Farrar JJ, Dunstan SJ, Hawn TR.  
538 Human TOLLIP Regulates TLR2 and TLR4 Signaling and Its Polymorphisms Are  
539 Associated with Susceptibility to Tuberculosis. *Journal of immunology* 2012; 189:  
540 1737-1746.
- 541 13. Jepson A, Fowler A, Banya W, Singh M, Bennett S, Whittle H, Hill AV. Genetic  
542 regulation of acquired immune responses to antigens of Mycobacterium  
543 tuberculosis: a study of twins in West Africa. *Infect Immun* 2001; 69: 3989-3994.
- 544 14. Cobat A, Hoal EG, Gallant CJ, Simkin L, Black GF, Stanley K, Jais JP, Yu TH,  
545 Boland-Auge A, Grange G, Delacourt C, van Helden P, Casanova JL, Abel L,  
546 Alcais A, Schurr E. Identification of a major locus, TNF1, that controls BCG-  
547 triggered tumor necrosis factor production by leukocytes in an area  
548 hyperendemic for tuberculosis. *Clin Infect Dis* 2013; 57: 963-970.
- 549 15. Cobat A, Poirier C, Hoal E, Boland-Auge A, de La Rocque F, Corrad F, Grange G,  
550 Migaud M, Bustamante J, Boisson-Dupuis S, Casanova JL, Schurr E, Alcais A,  
551 Delacourt C, Abel L. Tuberculin skin test negativity is under tight genetic control  
552 of chromosomal region 11p14-15 in settings with different tuberculosis  
553 endemicities. *J Infect Dis* 2015; 211: 317-321.
- 554 16. Sobota RS, Stein CM, Kodaman N, Scheinfeldt LB, Maro I, Wieland-Alter W, Igo  
555 RP, Jr., Magohe A, Malone LL, Chervenak K, Hall NB, Modongo C, Zetola N,  
556 Matee M, Joloba M, Froment A, Nyambo TB, Moore JH, Scott WK, Lahey T,  
557 Boom WH, von Reyn CF, Tishkoff SA, Sirugo G, Williams SM. A Locus at 5q33.3  
558 Confers Resistance to Tuberculosis in Highly Susceptible Individuals. *Am J Hum*  
559 *Genet* 2016; 98: 514-524.
- 560 17. Sobota RS, Stein CM, Kodaman N, Maro I, Wieland-Alter W, Igo RP, Jr., Magohe A,  
561 Malone LL, Chervenak K, Hall NB, Matee M, Mayanja-Kizza H, Joloba M, Moore  
562 JH, Scott WK, Lahey T, Boom WH, von Reyn CF, Williams SM, Sirugo G. A  
563 chromosome 5q31.1 locus associates with tuberculin skin test reactivity in HIV-  
564 positive individuals from tuberculosis hyper-endemic regions in east Africa. *PLoS*  
565 *Genet* 2017; 13: e1006710.
- 566 18. Li Y, Oosting M, Smeekens SP, Jaeger M, Aguirre-Gamboa R, Le KTT, Deelen P,  
567 Ricano-Ponce I, Schoffelen T, Jansen AFM, Swertz MA, Withoff S, van de Vosse  
568 E, van Deuren M, van de Veerdonk F, Zhernakova A, van der Meer JWM, Xavier  
569 RJ, Franke L, Joosten LAB, Wijmenga C, Kumar V, Netea MG. A Functional  
570 Genomics Approach to Understand Variation in Cytokine Production in Humans.  
571 *Cell* 2016; 167: 1099-1110 e1014.
- 572 19. Lee MN, Ye C, Villani AC, Raj T, Li W, Eisenhaure TM, Imboywa SH, Chipendo PI,  
573 Ran FA, Slowikowski K, Ward LD, Raddassi K, McCabe C, Lee MH, Frohlich IY,  
574 Hafler DA, Kellis M, Raychaudhuri S, Zhang F, Stranger BE, Benoist CO, De  
575 Jager PL, Regev A, Hacohen N. Common genetic variants modulate pathogen-  
576 sensing responses in human dendritic cells. *Science* 2014; 343: 1246980.
- 577 20. Roederer M, Quaye L, Mangino M, Beddall MH, Mahnke Y, Chattopadhyay P, Tosi  
578 I, Napolitano L, Terranova Barberio M, Menni C, Villanova F, Di Meglio P,  
579 Spector TD, Nestle FO. The genetic architecture of the human immune system: a

- 580 bioresource for autoimmunity and disease pathogenesis. *Cell* 2015; 161: 387-  
581 403.
- 582 21. Barreiro LB, Tailleux L, Pai AA, Gicquel B, Marioni JC, Gilad Y. Deciphering the  
583 genetic architecture of variation in the immune response to  
584 &em>Mycobacterium tuberculosis&/em>; infection. *Proceedings of the*  
585 *National Academy of Sciences* 2012; 109: 1204.
- 586 22. Schmiedel BJ, Singh D, Madrigal A, Valdovino-Gonzalez AG, White BM, Zapardiel-  
587 Gonzalo J, Ha B, Altay G, Greenbaum JA, McVicker G, Seumois G, Rao A,  
588 Kronenberg M, Peters B, Vijayanand P. Impact of Genetic Polymorphisms on  
589 Human Immune Cell Gene Expression. *Cell* 2018; 175: 1701-1715 e1716.
- 590 23. Shey MS, Nemes E, Whatney W, de Kock M, Africa H, Barnard C, van Rooyen M,  
591 Stone L, Riou C, Kollmann T, Hawn TR, Scriba TJ, Hanekom WA. Maturation of  
592 innate responses to mycobacteria over the first nine months of life. *J Immunol*  
593 2014; 192: 4833-4843.
- 594 24. Smolen KK, Cai B, Gelinias L, Fortuno ES, 3rd, Larsen M, Speert DP, Chamekh M,  
595 Cooper PJ, Esser M, Marchant A, Kollmann TR. Single-cell analysis of innate  
596 cytokine responses to pattern recognition receptor stimulation in children across  
597 four continents. *J Immunol* 2014; 193: 3003-3012.
- 598 25. Seshadri C, Thuong NT, Mai NT, Bang ND, Chau TT, Lewinsohn DM, Thwaites GE,  
599 Dunstan SJ, Hawn TR. A polymorphism in human MR1 is associated with mRNA  
600 expression and susceptibility to tuberculosis. *Genes Immun* 2017; 18: 8-14.
- 601 26. Pulendran B. The varieties of immunological experience: of pathogens, stress, and  
602 dendritic cells. *Annu Rev Immunol* 2015; 33: 563-606.
- 603 27. Tian T, Woodworth J, Skold M, Behar SM. In vivo depletion of CD11c+ cells delays  
604 the CD4+ T cell response to Mycobacterium tuberculosis and exacerbates the  
605 outcome of infection. *J Immunol* 2005; 175: 3268-3272.
- 606 28. Rosain J, Kong XF, Martinez-Barricarte R, Oleaga-Quintas C, Ramirez-Alejo N,  
607 Markle J, Okada S, Boisson-Dupuis S, Casanova JL, Bustamante J. Mendelian  
608 susceptibility to mycobacterial disease: 2014-2018 update. *Immunol Cell Biol*  
609 2019; 97: 360-367.
- 610 29. Notarangelo LD, Bacchetta R, Casanova JL, Su HC. Human inborn errors of  
611 immunity: An expanding universe. *Sci Immunol* 2020; 5.
- 612 30. Wu UI, Holland SM. A genetic perspective on granulomatous diseases with an  
613 emphasis on mycobacterial infections. *Semin Immunopathol* 2016; 38: 199-212.
- 614 31. Chen Y, Sharma S, Assis PA, Jiang Z, Elling R, Olive AJ, Hang S, Bernier J, Huh  
615 JR, Sasseti CM, Knipe DM, Gazzinelli RT, Fitzgerald KA. CNBP controls IL-12  
616 gene transcription and Th1 immunity. *J Exp Med* 2018; 215: 3136-3150.
- 617 32. Moreira-Teixeira L, Redford PS, Stavropoulos E, Ghilardi N, Maynard CL, Weaver  
618 CT, Freitas do Rosario AP, Wu X, Langhorne J, O'Garra A. T Cell-Derived IL-10  
619 Impairs Host Resistance to Mycobacterium tuberculosis Infection. *J Immunol*  
620 2017; 199: 613-623.
- 621 33. Pitt JM, Stavropoulos E, Redford PS, Beebe AM, Bancroft GJ, Young DB, O'Garra  
622 A. Blockade of IL-10 signaling during bacillus Calmette-Guerin vaccination  
623 enhances and sustains Th1, Th17, and innate lymphoid IFN-gamma and IL-17  
624 responses and increases protection to Mycobacterium tuberculosis infection. *J*  
625 *Immunol* 2012; 189: 4079-4087.



- 626 34. Huynh JP, Lin CC, Kimmey JM, Jarjour NN, Schwarzkopf EA, Bradstreet TR,  
627 Shchukina I, Shpynov O, Weaver CT, Taneja R, Artyomov MN, Edelson BT,  
628 Stallings CL. Bhlhe40 is an essential repressor of IL-10 during Mycobacterium  
629 tuberculosis infection. *J Exp Med* 2018; 215: 1823-1838.
- 630 35. Kagina BM, Abel B, Bowmaker M, Scriba TJ, Gelderbloem S, Smit E, Erasmus M,  
631 Nene N, Walzl G, Black G, Hussey GD, Hesselting AC, Hanekom WA. Delaying  
632 BCG vaccination from birth to 10 weeks of age may result in an enhanced  
633 memory CD4 T cell response. *Vaccine* 2009; 27: 5488-5495.
- 634 36. Kagina BM, Abel B, Scriba TJ, Hughes EJ, Keyser A, Soares A, Gamielien H,  
635 Sidibana M, Hatherill M, Gelderbloem S, Mahomed H, Hawkridge A, Hussey G,  
636 Kaplan G, Hanekom WA. Specific T cell frequency and cytokine expression  
637 profile do not correlate with protection against tuberculosis after bacillus  
638 Calmette-Guerin vaccination of newborns. *American journal of respiratory and  
639 critical care medicine* 2010; 182: 1073-1079.
- 640 37. Shah JA, Musvosvi M, Shey M, Horne DJ, Wells RD, Peterson GJ, Cox JS, Daya M,  
641 Hoal EG, Lin L, Gottardo R, Hanekom WA, Scriba TJ, Hatherill M, Hawn TR. A  
642 Functional TOLLIP Variant is Associated with BCG-Specific Immune Responses  
643 and Tuberculosis. *Am J Respir Crit Care Med* 2017.
- 644 38. Khor CC, Do T, Jia H, Nakano M, George R, Abu-Amero K, Duvesh R, Chen LJ, Li  
645 Z, Nongpiur ME, Perera SA, Qiao C, Wong HT, Sakai H, Barbosa de Melo M,  
646 Lee MC, Chan AS, Azhany Y, Dao TL, Ikeda Y, Perez-Grossmann RA,  
647 Zarnowski T, Day AC, Jonas JB, Tam PO, Tran TA, Ayub H, Akhtar F, Micheal S,  
648 Chew PT, Aljasim LA, Dada T, Luu TT, Awadalla MS, Kitnarong N,  
649 Wanichwecharungruang B, Aung YY, Mohamed-Noor J, Vijayan S, Sarangapani  
650 S, Husain R, Jap A, Baskaran M, Goh D, Su DH, Wang H, Yong VK, Yip LW,  
651 Trinh TB, Makornwattana M, Nguyen TT, Leuenberger EU, Park KH, Wiyogo  
652 WA, Kumar RS, Tello C, Kurimoto Y, Thapa SS, Pathanapitoun K, Salmon JF,  
653 Sohn YH, Fea A, Ozaki M, Lai JS, Tantisevi V, Khaing CC, Mizoguchi T, Nakano  
654 S, Kim CY, Tang G, Fan S, Wu R, Meng H, Nguyen TT, Tran TD, Ueno M,  
655 Martinez JM, Ramli N, Aung YM, Reyes RD, Vernon SA, Fang SK, Xie Z, Chen  
656 XY, Foo JN, Sim KS, Wong TT, Quek DT, Venkatesh R, Kavitha S, Krishnadas  
657 SR, Soumittra N, Shantha B, Lim BA, Ogle J, de Vasconcellos JP, Costa VP,  
658 Abe RY, de Souza BB, Sng CC, Aquino MC, Kosior-Jarecka E, Fong GB,  
659 Tamanaja VC, Fujita R, Jiang Y, Waseem N, Low S, Pham HN, Al-Shahwan S,  
660 Craven ER, Khan MI, Dada R, Mohanty K, Faiq MA, Hewitt AW, Burdon KP, Gan  
661 EH, Prutthipongsit A, Patthanathamrongkasem T, Catacutan MA, Felarca IR,  
662 Liao CS, Rusmayani E, Istiantoro VW, Consolandi G, Pignata G, Lavia C,  
663 Rojanapongpun P, Mangkornkanokpong L, Chansangpetch S, Chan JC, Choy  
664 BN, Shum JW, Than HM, Oo KT, Han AT, Yong VH, Ng XY, Goh SR, Chong YF,  
665 Hibberd ML, Seielstad M, Png E, Dunstan SJ, Chau NV, Bei J, Zeng YX, Karkey  
666 A, Basnyat B, Pasutto F, Paoli D, Frezzotti P, Wang JJ, Mitchell P, Fingert JH,  
667 Allingham RR, Hauser MA, Lim ST, Chew SH, Ebstein RP, Sakuntabhai A, Park  
668 KH, Ahn J, Boland G, Snippe H, Stead R, Quino R, Zaw SN, Lukasik U, Shetty  
669 R, Zahari M, Bae HW, Oo NL, Kubota T, Manassakorn A, Ho WL, Dallorto L,  
670 Hwang YH, Kiire CA, Kuroda M, Djamal ZE, Peregrino JI, Ghosh A, Jeoung JW,  
671 Hoan TS, Srisamran N, Sandragasu T, Set SH, Doan VH, Bhattacharya SS, Ho

- 672 CL, Tan DT, Sihota R, Loon SC, Mori K, Kinoshita S, Hollander AI, Qamar R,  
673 Wang YX, Teo YY, Tai ES, Hartleben-Matkin C, Lozano-Giral D, Saw SM, Cheng  
674 CY, Zenteno JC, Pang CP, Bui HT, Hee O, Craig JE, Edward DP, Yonahara M,  
675 Neto JM, Guevara-Fujita ML, Xu L, Ritch R, Liza-Sharmini AT, Wong TY, Al-  
676 Obeidan S, Do NH, Sundaresan P, Tham CC, Foster PJ, Vijaya L, Tashiro K,  
677 Vithana EN, Wang N, Aung T. Genome-wide association study identifies five new  
678 susceptibility loci for primary angle closure glaucoma. *Nat Genet* 2016; 48: 556-  
679 562.
- 680 39. Dunstan SJ, Hue NT, Han B, Li Z, Tram TTB, Sim KS, Parry CM, Chinh NT, Vinh H,  
681 Lan NPH, Thieu NTV, Vinh PV, Koirala S, Dongol S, Arjyal A, Karkey A,  
682 Shilpakar O, Dolecek C, Foo JN, Phuong LT, Lanh MN, Do T, Aung T, Hon DN,  
683 Teo YY, Hibberd ML, Anders KL, Okada Y, Raychaudhuri S, Simmons CP, Baker  
684 S, de Bakker PIW, Basnyat B, Hien TT, Farrar JJ, Khor CC. Variation at HLA-  
685 DRB1 is associated with resistance to enteric fever. *Nature Genetics* 2014; 46:  
686 1333-1336.
- 687 40. Bustamante J, Boisson-Dupuis S, Abel L, Casanova JL. Mendelian susceptibility to  
688 mycobacterial disease: genetic, immunological, and clinical features of inborn  
689 errors of IFN-gamma immunity. *Semin Immunol* 2014; 26: 454-470.
- 690 41. Mangino M, Roederer M, Beddall MH, Nestle FO, Spector TD. Innate and adaptive  
691 immune traits are differentially affected by genetic and environmental factors.  
692 *Nature Communications* 2017; 8: 13850.
- 693 42. Redford PS, Murray PJ, O'Garra A. The role of IL-10 in immune regulation during M.  
694 tuberculosis infection. *Mucosal Immunol* 2011; 4: 261-270.
- 695 43. Groux H, Bigler M, de Vries JE, Roncarolo MG. Interleukin-10 induces a long-term  
696 antigen-specific anergic state in human CD4+ T cells. *J Exp Med* 1996; 184: 19-  
697 29.
- 698 44. Shafiani S, Dinh C, Ertelt JM, Moguche AO, Siddiqui I, Smigiel KS, Sharma P,  
699 Campbell DJ, Way SS, Urdahl KB. Pathogen-specific Treg cells expand early  
700 during mycobacterium tuberculosis infection but are later eliminated in response  
701 to Interleukin-12. *Immunity* 2013; 38: 1261-1270.
- 702 45. Sakai S, Kauffman KD, Sallin MA, Sharpe AH, Young HA, Ganusov VV, Barber DL.  
703 CD4 T Cell-Derived IFN-gamma Plays a Minimal Role in Control of Pulmonary  
704 Mycobacterium tuberculosis Infection and Must Be Actively Repressed by PD-1  
705 to Prevent Lethal Disease. *PLoS Pathog* 2016; 12: e1005667.
- 706 46. Lin CC, Bradstreet TR, Schwarzkopf EA, Sim J, Carrero JA, Chou C, Cook LE,  
707 Egawa T, Taneja R, Murphy TL, Russell JH, Edelson BT. Bhlhe40 controls  
708 cytokine production by T cells and is essential for pathogenicity in autoimmune  
709 neuroinflammation. *Nat Commun* 2014; 5: 3551.
- 710 47. Ip WKE, Hoshi N, Shouval DS, Snapper S, Medzhitov R. Anti-inflammatory effect of  
711 IL-10 mediated by metabolic reprogramming of macrophages. *Science* 2017;  
712 356: 513-519.
- 713 48. Tobin DM, Vary JC, Jr., Ray JP, Walsh GS, Dunstan SJ, Bang ND, Hagge DA,  
714 Khadge S, King MC, Hawn TR, Moens CB, Ramakrishnan L. The Itih4 locus  
715 modulates susceptibility to mycobacterial infection in zebrafish and humans. *Cell*  
716 2010; 140: 717-730.



- 717 49. Mahnke YD, Greenwald JH, DerSimonian R, Roby G, Antonelli LR, Sher A,  
718 Roederer M, Sereti I. Selective expansion of polyfunctional pathogen-specific  
719 CD4(+) T cells in HIV-1-infected patients with immune reconstitution  
720 inflammatory syndrome. *Blood* 2012; 119: 3105-3112.
- 721 50. Openshaw P, Murphy EE, Hosken NA, Maino V, Davis K, Murphy K, O'Garra A.  
722 Heterogeneity of intracellular cytokine synthesis at the single-cell level in  
723 polarized T helper 1 and T helper 2 populations. *J Exp Med* 1995; 182: 1357-  
724 1367.
- 725 51. Roca FJ, Whitworth LJ, Redmond S, Jones AA, Ramakrishnan L. TNF Induces  
726 Pathogenic Programmed Macrophage Necrosis in Tuberculosis through a  
727 Mitochondrial-Lysosomal-Endoplasmic Reticulum Circuit. *Cell* 2019; 178: 1344-  
728 1361 e1311.  
729

A

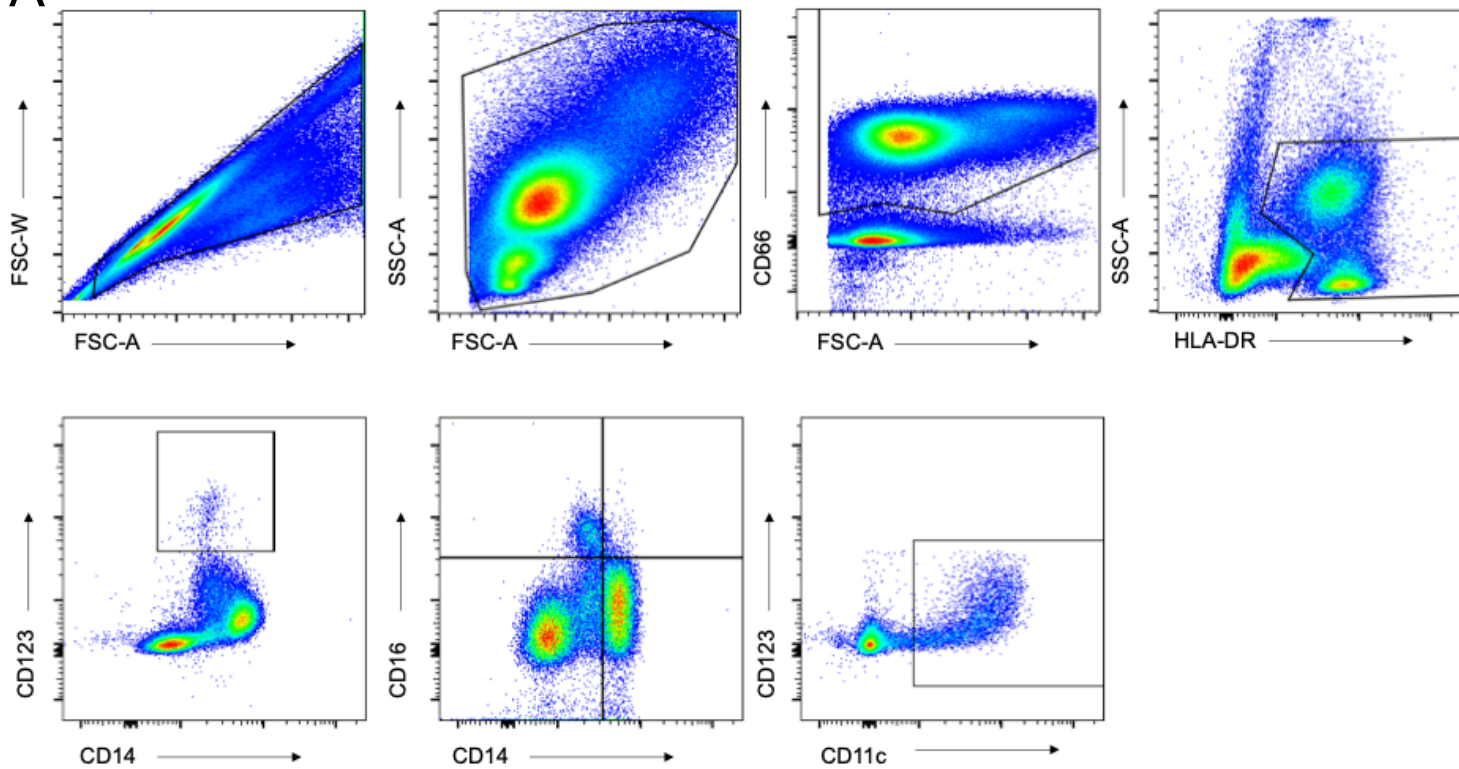

B

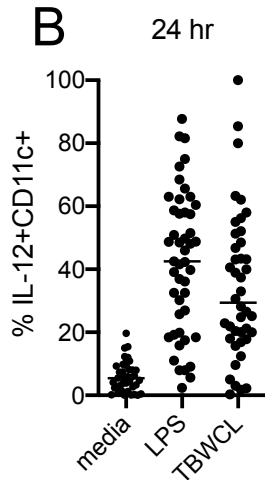

C

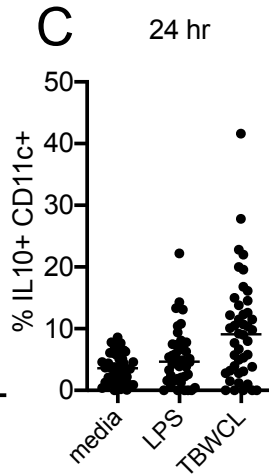

D

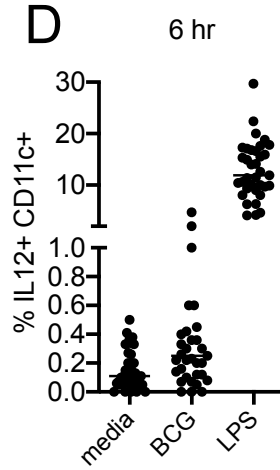

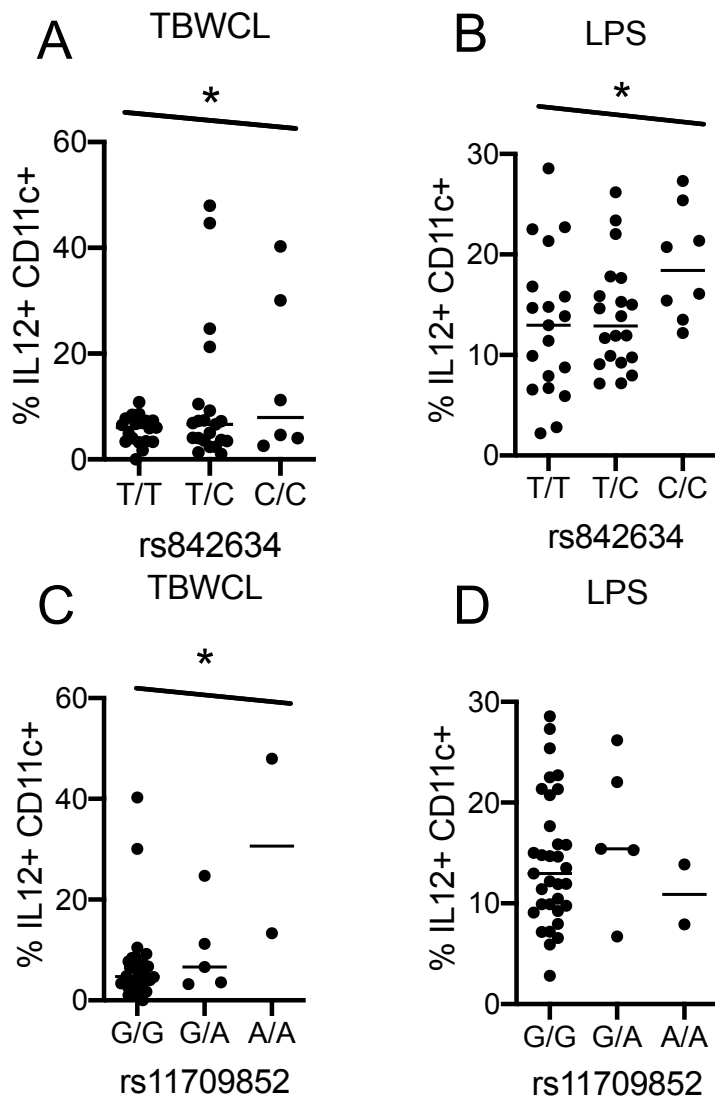

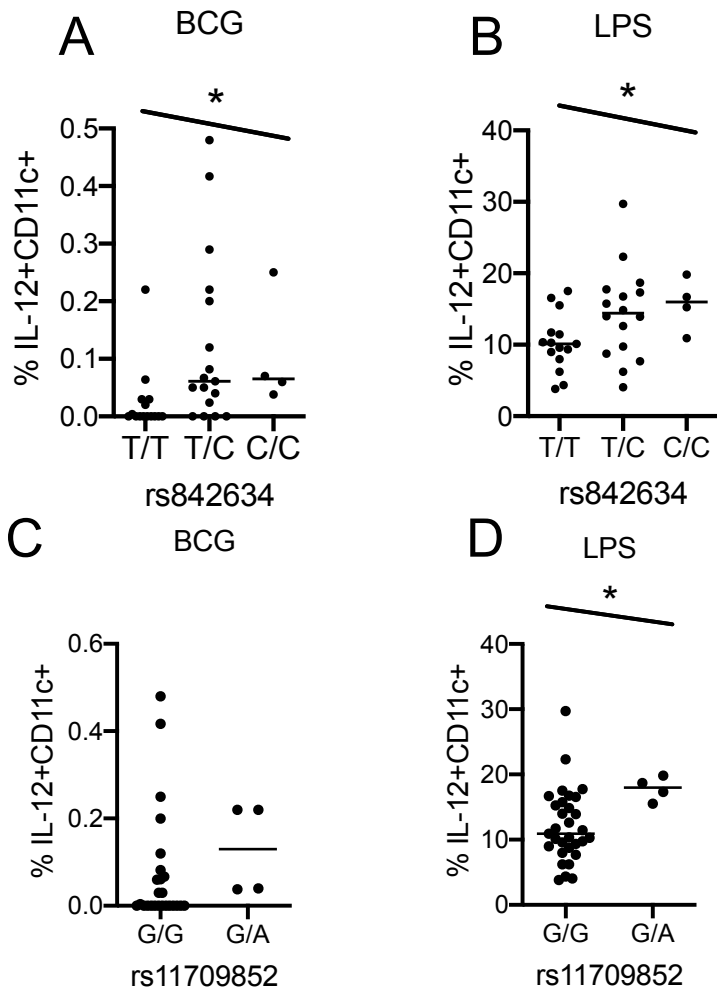

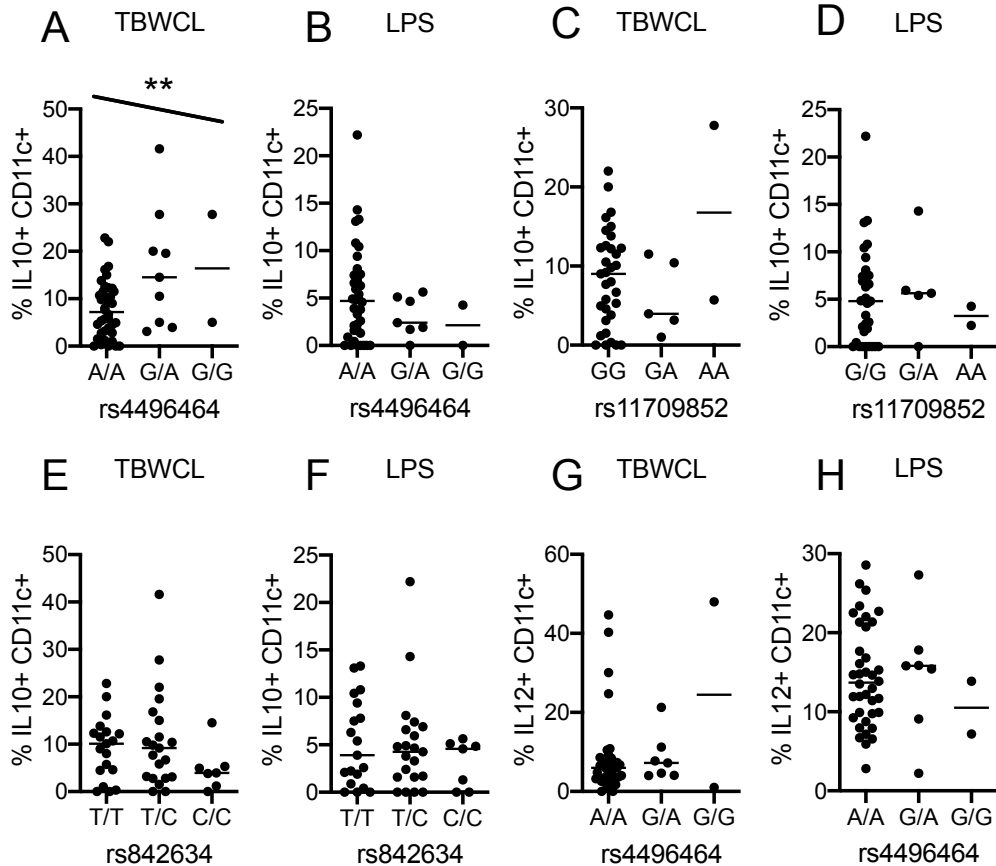

Figure 5

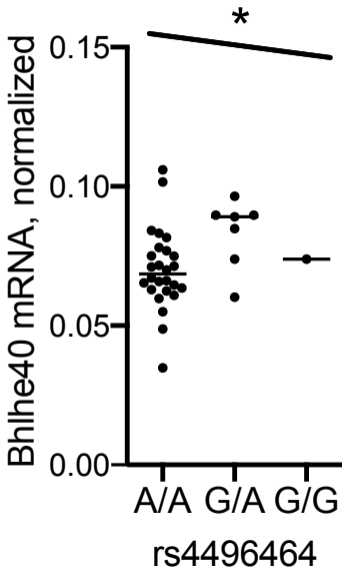

Figure 6

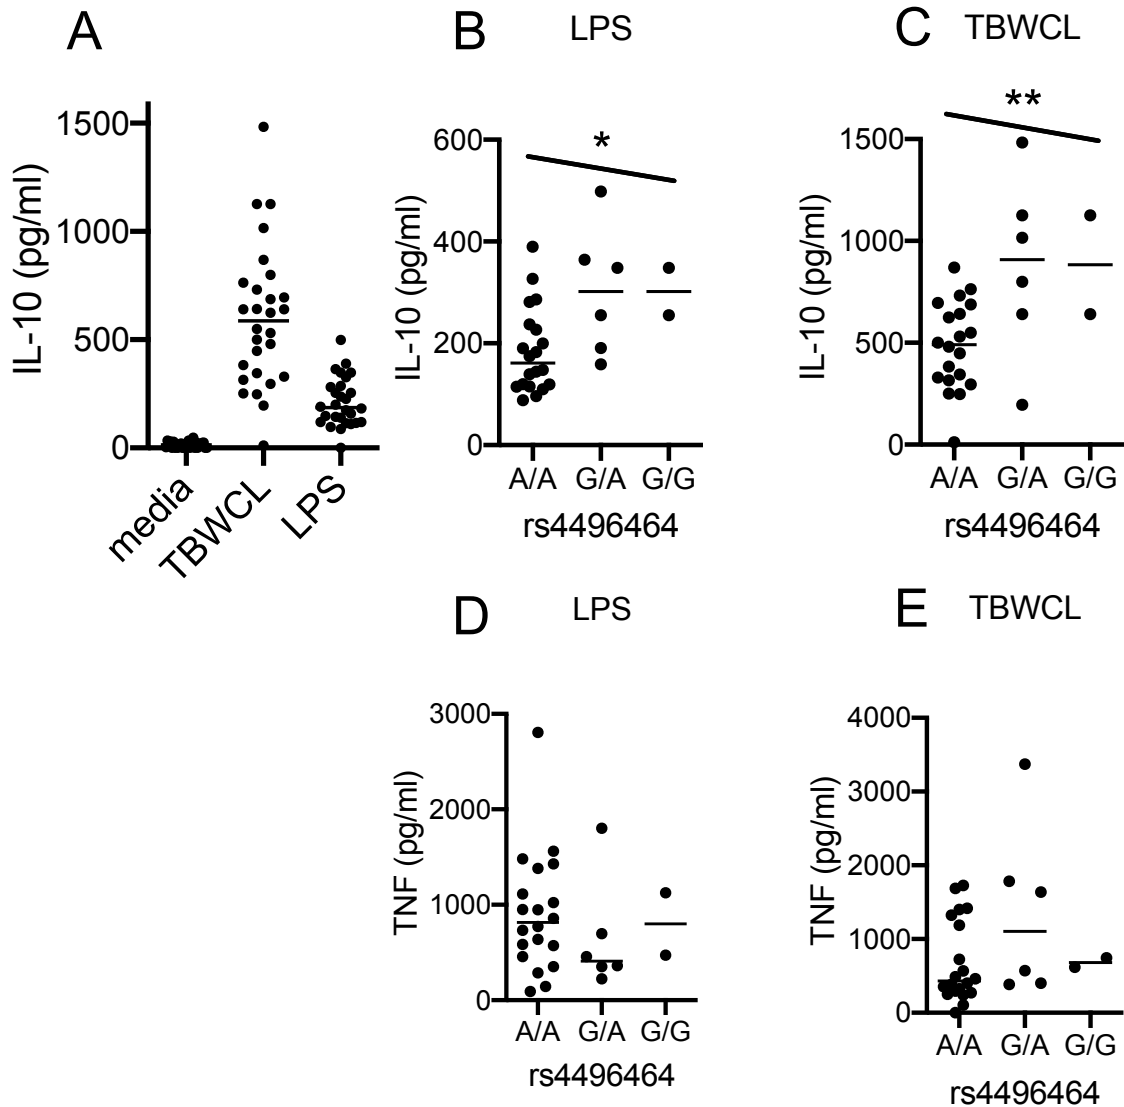

**A**

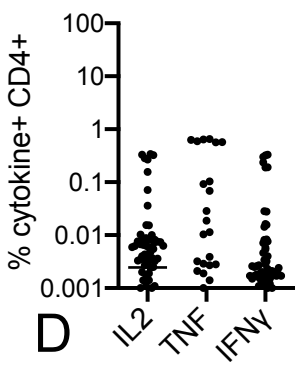

**B**

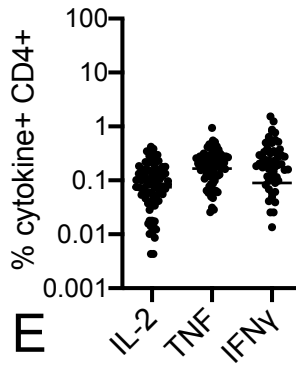

**C**

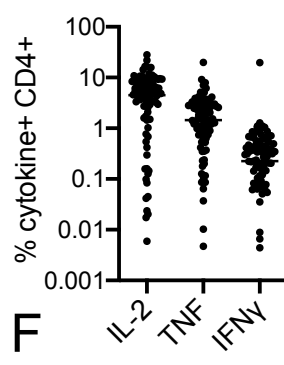

**D**

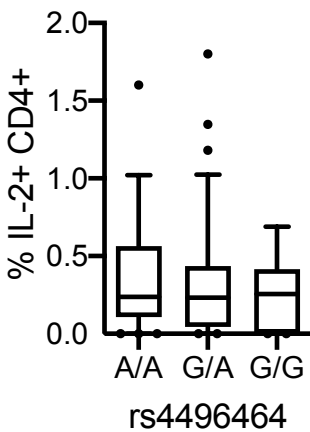

**E**

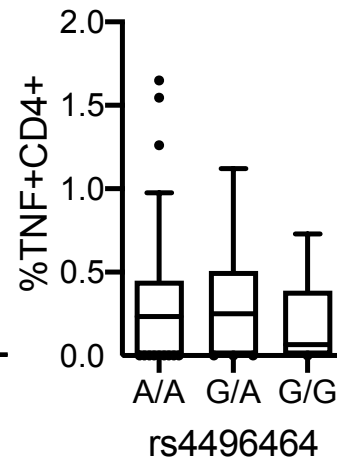

**F**

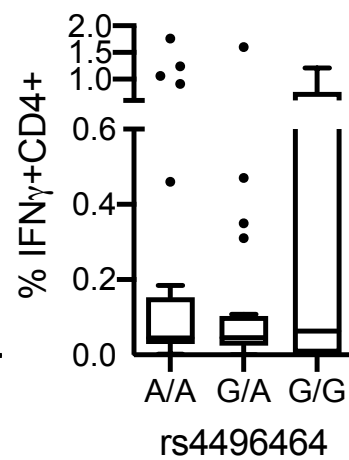

**G**

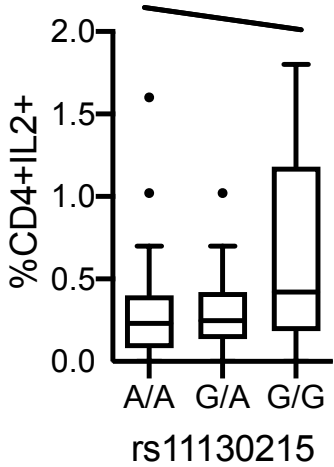

**H**

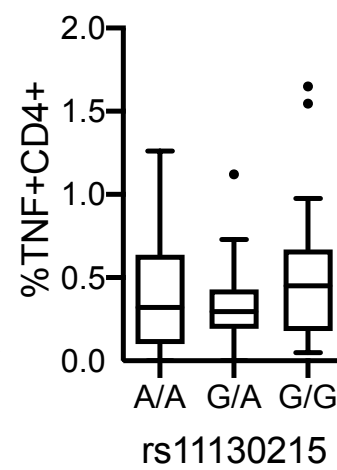

**I**

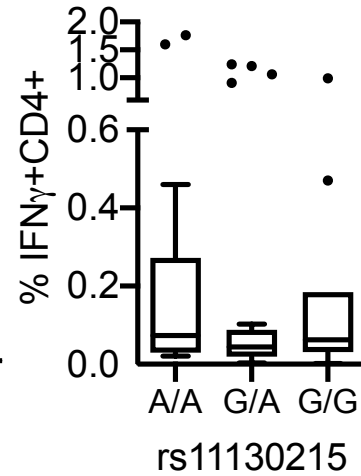

**J**

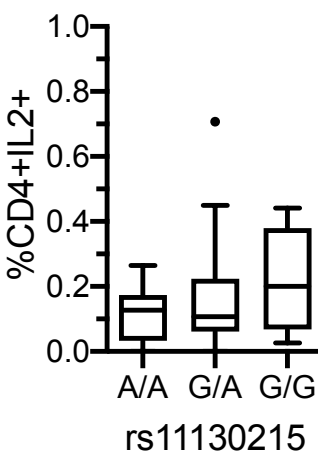

**K**

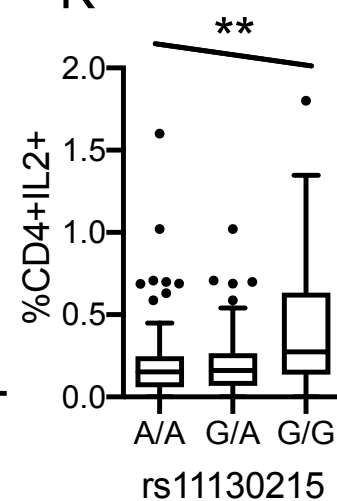

Source: https://medrxiv.org/content/10.1101/2021.03.03.21252797.full.pdf
